# Supplementary material
Source: ML conference proceedings conference paper supplement (https://openaccess.thecvf.com/content/cvpr_2017/html/Karlinsky_Fine-Grained_Recognition_of_2017_CVPR_paper.html)
Supplement: Supplementary file 2 [file Karlinsky_Fine-Grained_Recognition_of_2017_CVPR_supplemental.zip.zip]

Archive with 5 entries (5 files):
- car_PCPE_compressed.mp4
- engine_PCPE_compressed.mp4
- GameStop_023_compressed.mp4
- Retail121_1_compressed.mp4
- Submission_1665_suppplementary.pdf
